# Supplementary material for: UAV-Based Hyperspectral Imaging for River Algae Pigment Estimation
Source: MDPI journal article supplement (doi:10.3390/rs15123148), 2023-06-16
Supplement: s1 [file s1]

## Supplementary Materials:

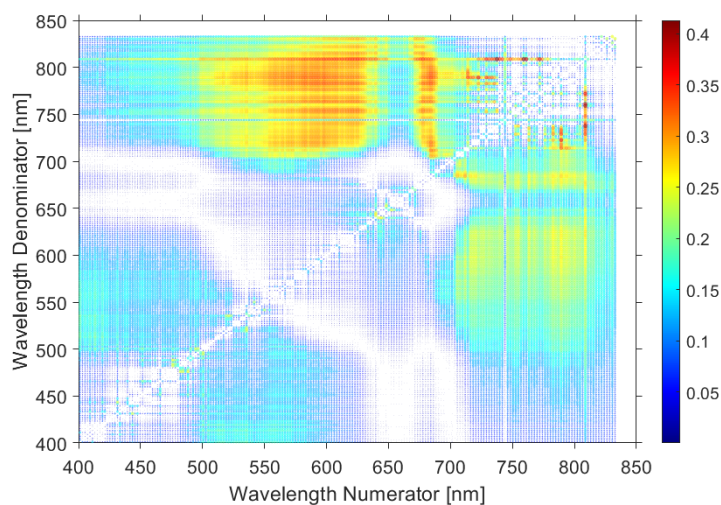

(a) Heat map of  $R^2$  values generated by fitting each band combination against total phycocyanin standing crops. Colors within the heat map represent the  $R^2$  value, with wavelength numerators and denominators shown on the x- and y-axes, respectively.

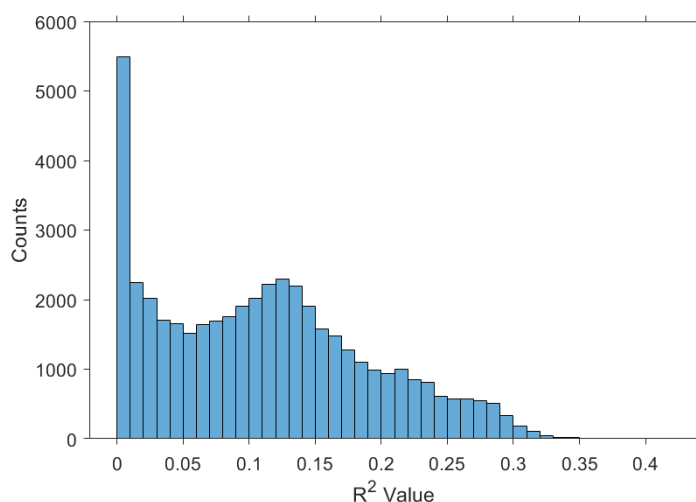

(b) Histogram of the  $R^2$  values generated using the brute-force analysis.

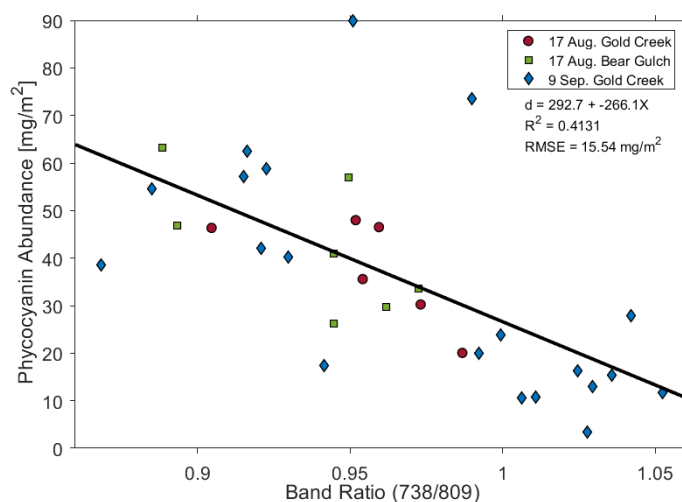

(c) Linear regression analysis between total phycocyanin abundance (y-axis) and optimal band ratio (x-axis). Data collected on 17 August 2021 at the Gold Creek and Bear Gulch site represented by red circles and green squares, respectively, while data collected on 9 September 2021 are shown with blue diamonds.

**Figure S1.** Analytics from the regression analysis of total phycocyanin standing crops from the combined (all field sites) data set.

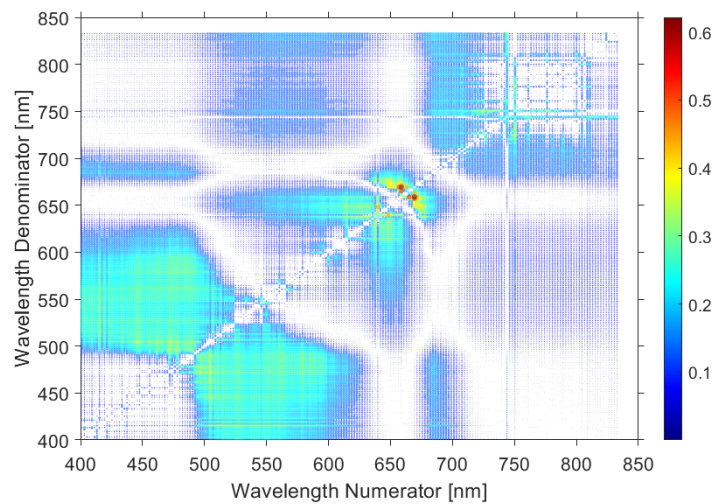

(a) Heat map of  $R^2$  values generated by fitting each band combination against fila/epip chl *a* standing crops. Colors within the heat map represent the  $R^2$  value, with wavelength numerators and denominators shown on the x- and y-axes, respectively.

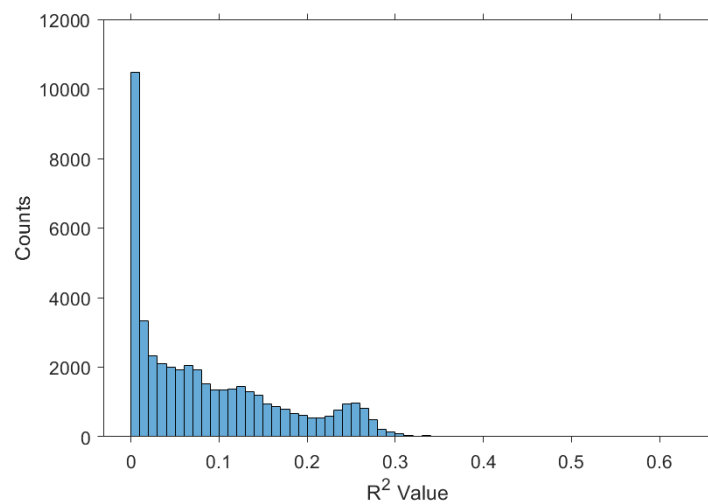

(b) Histogram of the  $R^2$  values generated using the brute-force analysis.

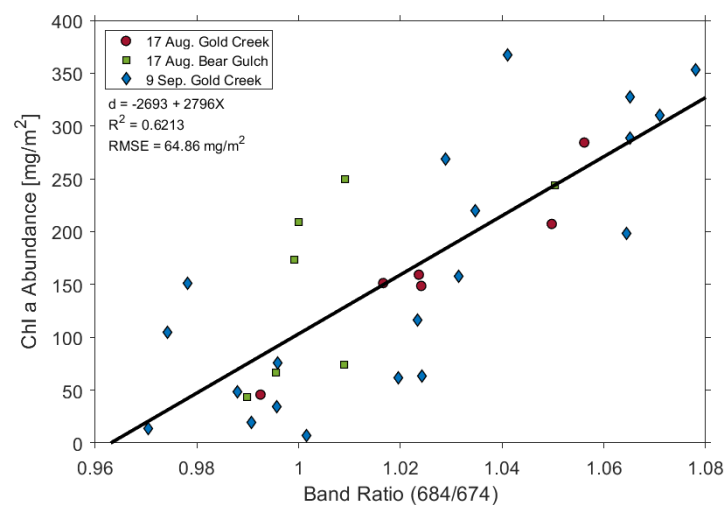

(c) Linear regression analysis between chl *a* abundance (y-axis) and optimal band ratio (x-axis). Data collected on 17 August 2021 at the Gold Creek and Bear Gulch site represented by red circles and green squares, respectively, while data collected on 9 September 2021 are shown with blue diamonds.

**Figure S2.** Analytics from the regression analysis of fila/epip chl *a* standing crops from the combined (all field sites) data set.

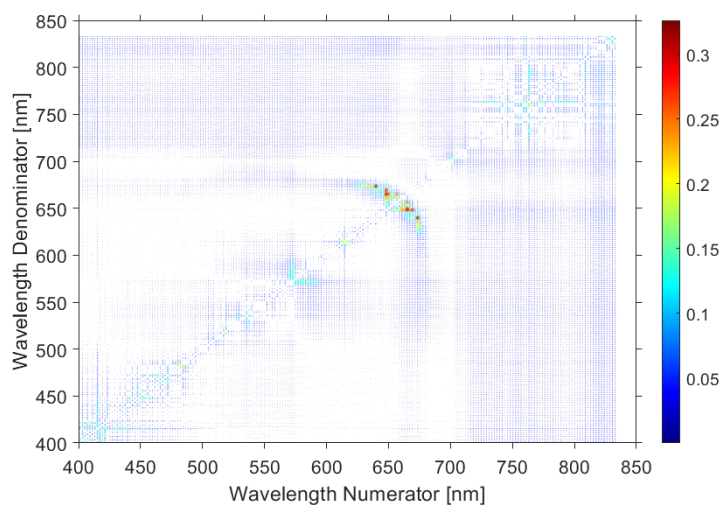

(a) Heat map of  $R^2$  values generated by fitting each band combination against epiphytic phycocyanin standing crops. Colors within the heat map represent the  $R^2$  value, with wavelength numerators and denominators shown on the x- and y-axes, respectively.

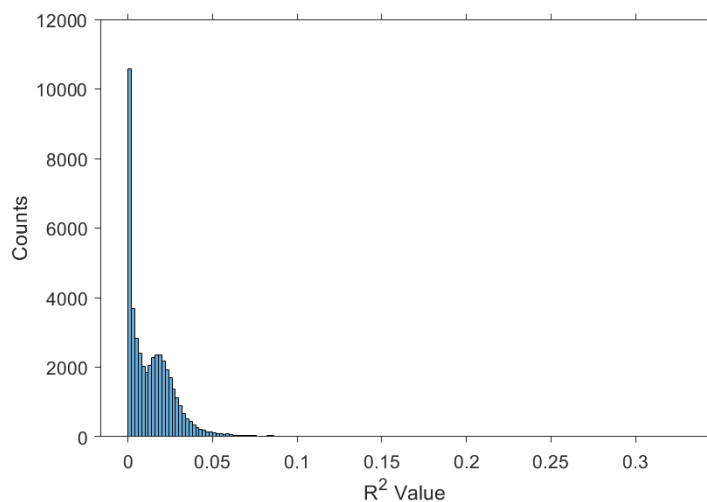

(b) Histogram of the  $R^2$  values generated using the brute-force analysis.

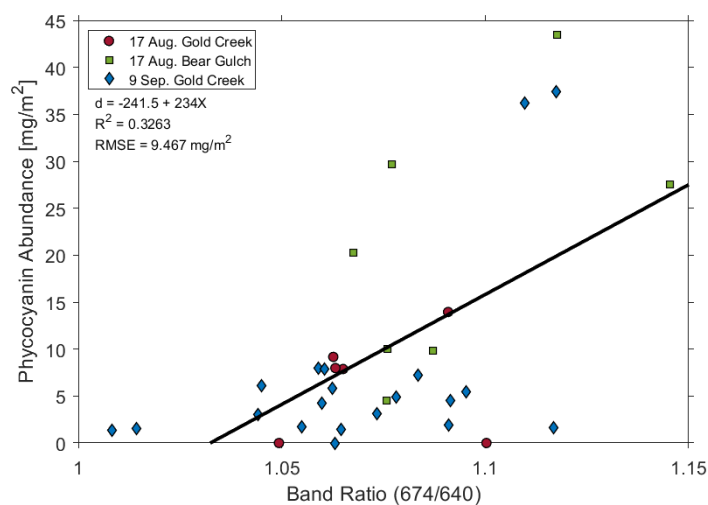

(c) Linear regression analysis between phycocyanin abundance (y-axis) and optimal band ratio (x-axis). Data collected on 17 August 2021 at the Gold Creek and Bear Gulch site represented by red circles and green squares, respectively, while data collected on 9 September 2021 are shown with blue diamonds.

**Figure S3.** Analytics from the regression analysis of epiphytic phycocyanin standing crops from the combined (all field sites) data set.

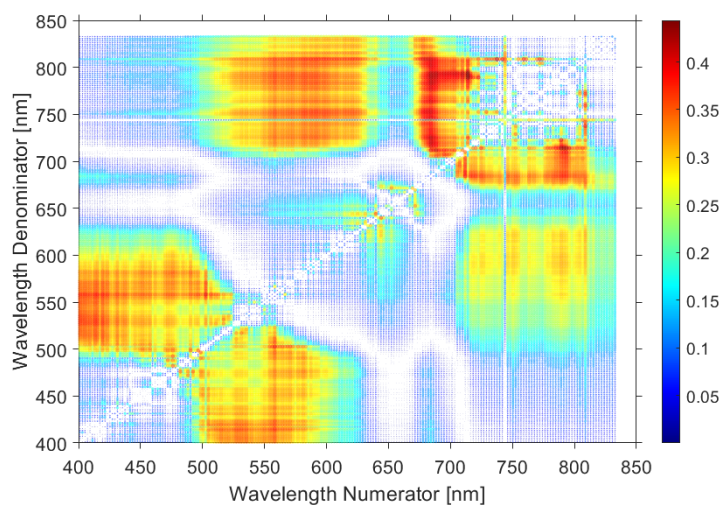

(a) Heat map of  $R^2$  values generated by fitting each band combination against epilithic chl *a* standing crops. Colors within the heat map represent the  $R^2$  value, with wavelength numerators and denominators shown on the x- and y-axes, respectively.

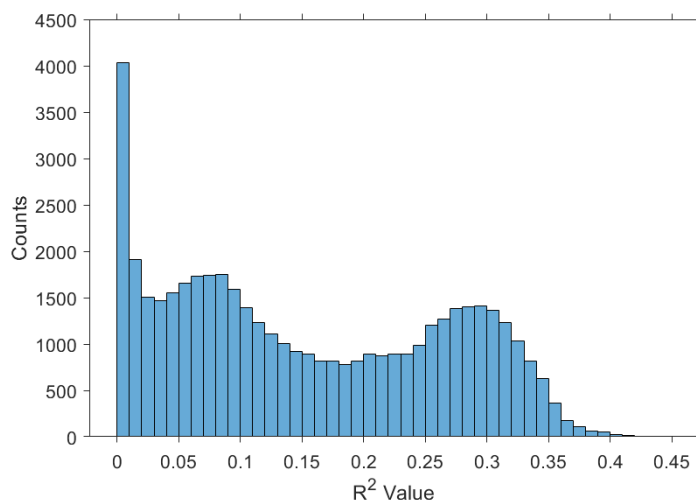

(b) Histogram of the  $R^2$  values generated using the brute-force analysis.

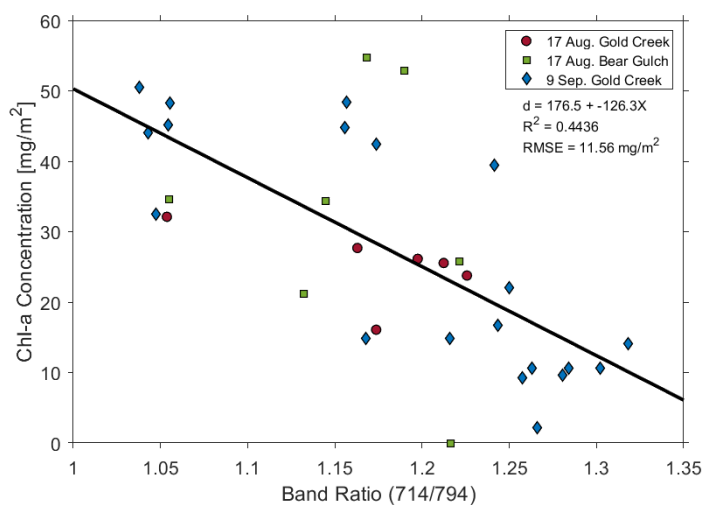

(c) Linear regression analysis between epilithic chl *a* abundance (y-axis) and optimal band ratio (x-axis). Data collected on 17 August 2021 at the Gold Creek and Bear Gulch site represented by red circles and green squares, respectively, while data collected on 9 September 2021 are shown with blue diamonds.

**Figure S4.** Analytics from the regression analysis of epilithic chl *a* standing crops from the combined (all field sites) data set.

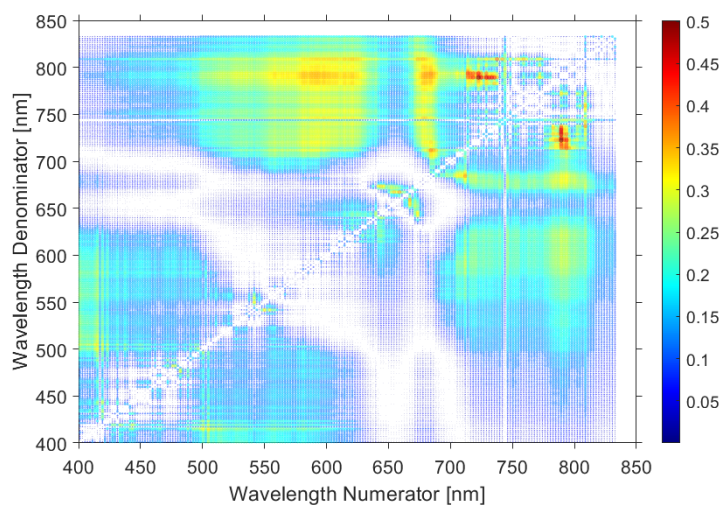

(a) Heat map of  $R^2$  values generated by fitting each band combination against epilithic phycocyanin standing crops. Colors within the heat map represent the  $R^2$  value, with wavelength numerators and denominators shown on the x- and y-axes, respectively.

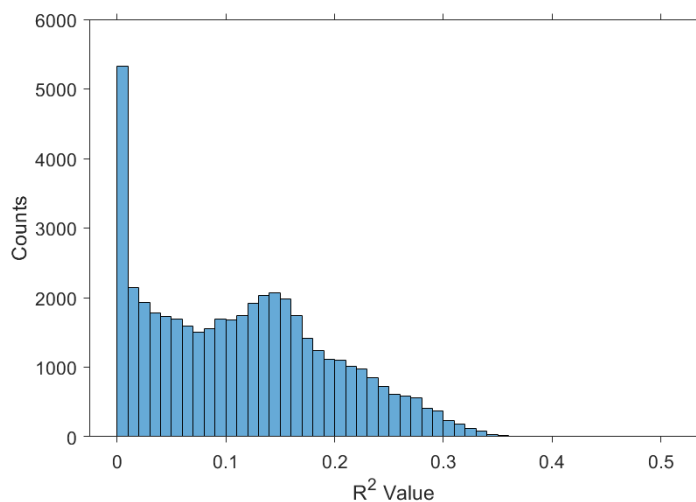

(b) Histogram of the  $R^2$  values generated using the brute-force analysis.

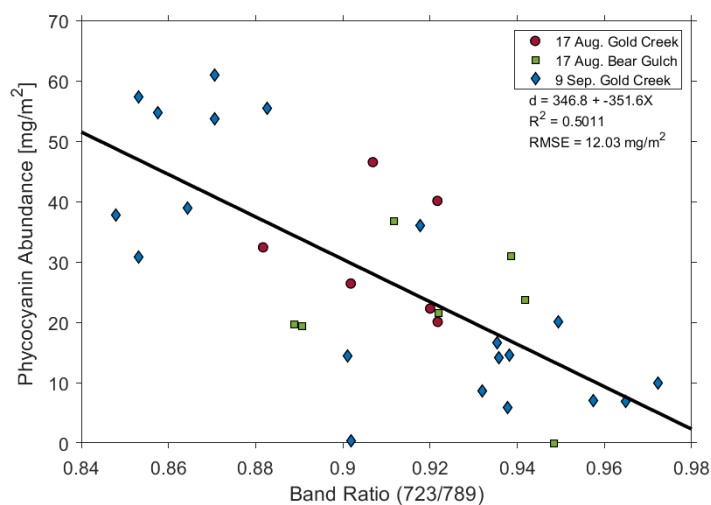

(c) Linear regression analysis between epilithic phycocyanin abundance (y-axis) and optimal band ratio (x-axis). Data collected on 17 August 2021 at the Gold Creek and Bear Gulch site represented by red circles and green squares, respectively, while data collected on 9 September 2021 are shown with blue diamonds.

**Figure S5.** Analytics from the regression analysis of epilithic phycocyanin standing crops from the combined (all field sites) data set.

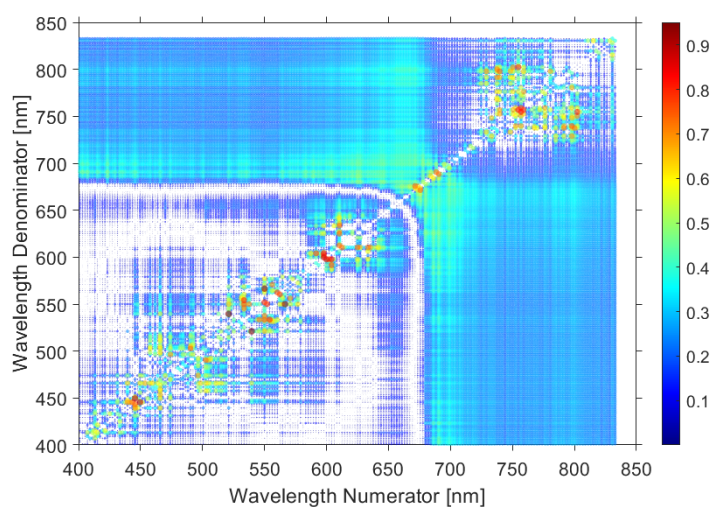

(a) Heat map of  $R^2$  values generated by fitting each band combination against total chl *a* standing crops. Colors within the heat map represent the  $R^2$  value, with wavelength numerators and denominators shown on the x- and y-axes, respectively.

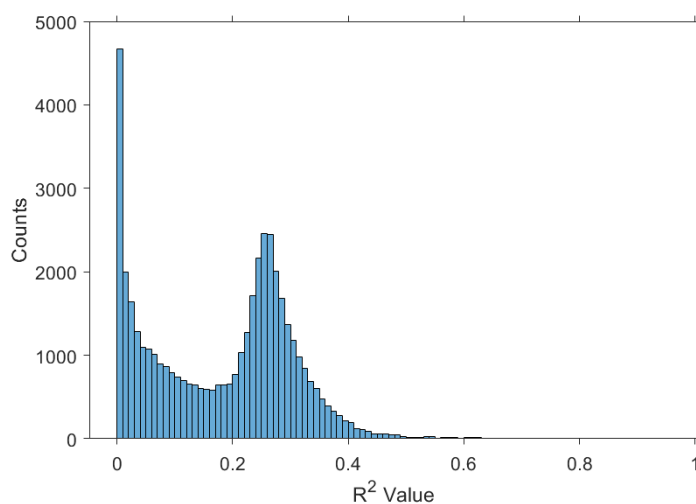

(b) Histogram of the  $R^2$  values generated using the brute-force analysis.

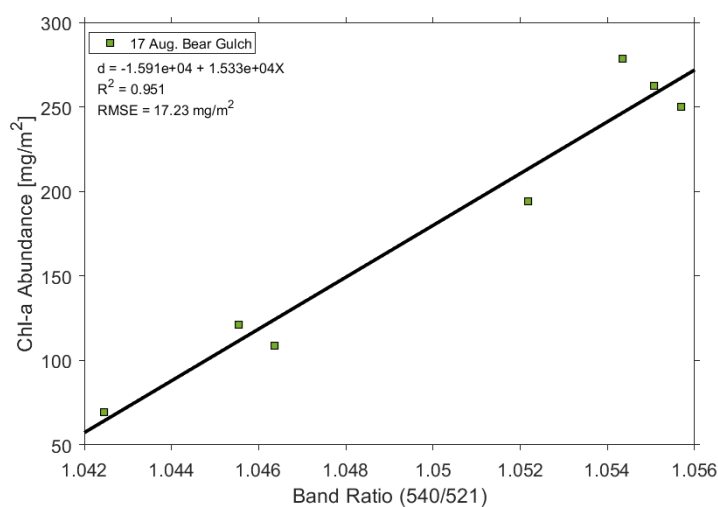

(c) Linear regression analysis between total chl *a* abundance (y-axis) and optimal band ratio (x-axis). Data collected on 17 August 2021 at the Bear Gulch site represented by green squares.

**Figure S6.** Analytics from the regression analysis of total chl *a* standing crops from the Bear Gulch data set.



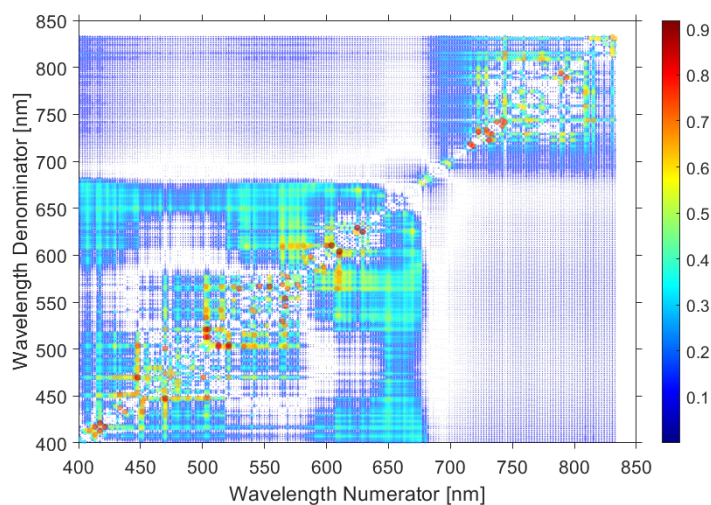

(a) Heat map of  $R^2$  values generated by fitting each band combination against total phycocyanin standing crops. Colors within the heat map represent the  $R^2$  value, with wavelength numerators and denominators shown on the x- and y-axes, respectively.

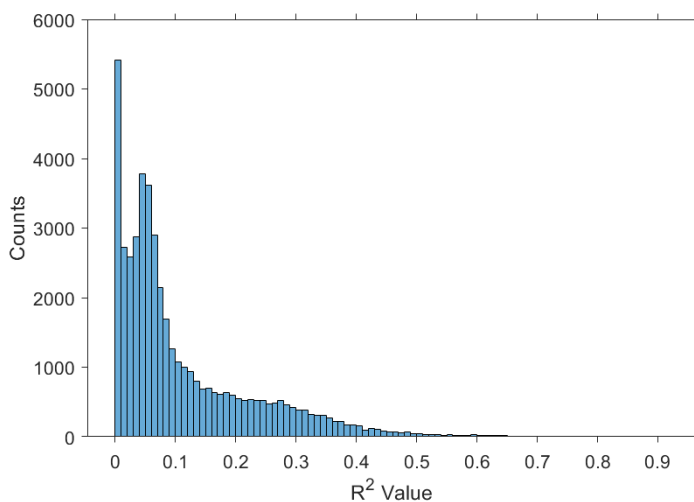

(b) Histogram of the  $R^2$  values generated using the brute-force analysis.

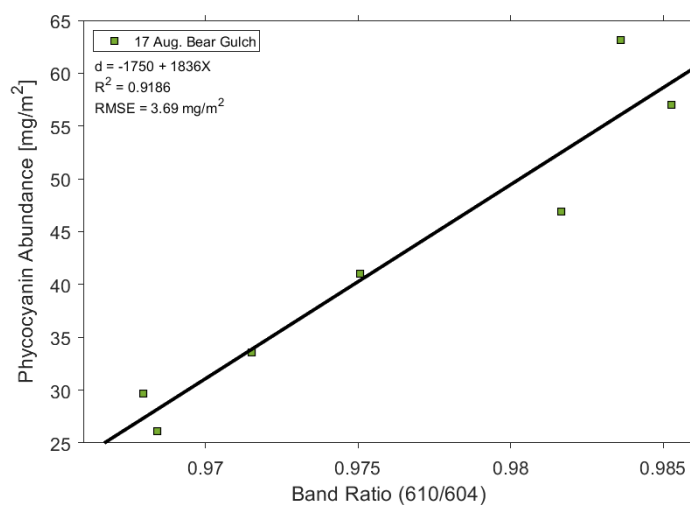

(c) Linear regression analysis between total phycocyanin abundance (y-axis) and optimal band ratio (x-axis). Data collected on 17 August 2021 at the Bear Gulch site represented by green squares.

**Figure S7.** Analytics from the regression analysis of total phycocyanin standing crops from the Bear Gulch data set.



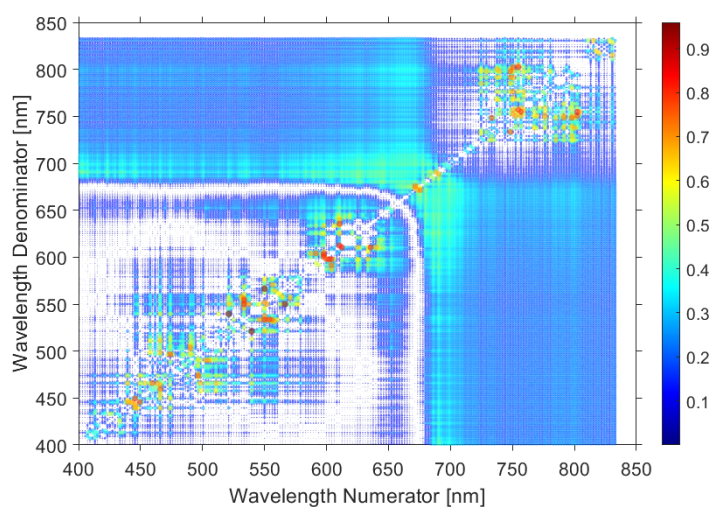

(a) Heat map of  $R^2$  values generated by fitting each band combination against fila/epip chl *a* standing crops. Colors within the heat map represent the  $R^2$  value, with wavelength numerators and denominators shown on the x- and y-axes, respectively.

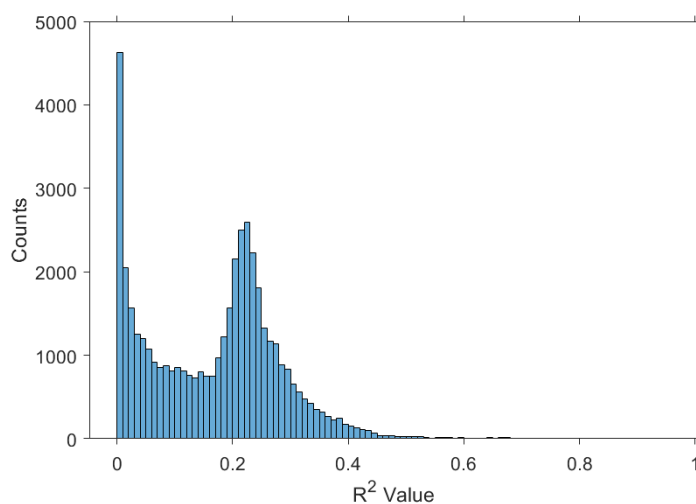

(b) Histogram of the  $R^2$  values generated using the brute-force analysis.

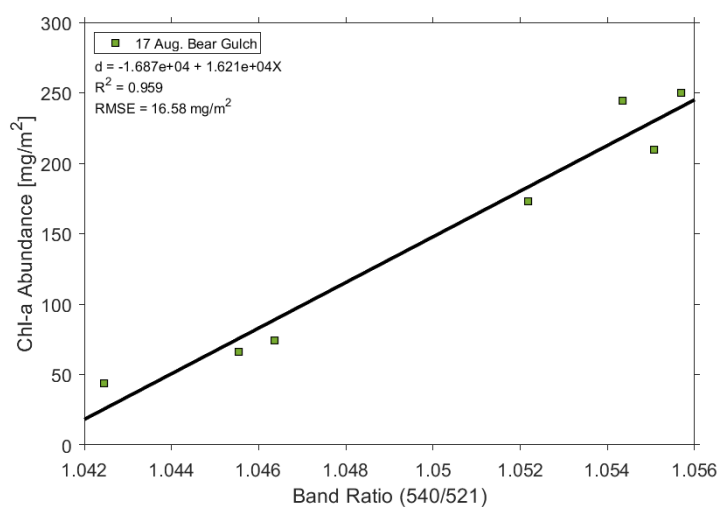

(c) Linear regression analysis between fila/epip chl *a* abundance (y-axis) and optimal band ratio (x-axis). Data collected on 17 August 2021 at the Bear Gulch site represented by green squares.

**Figure S8.** Analytics from the regression analysis of fila/epip chl *a* standing crops from the Bear Gulch data set.

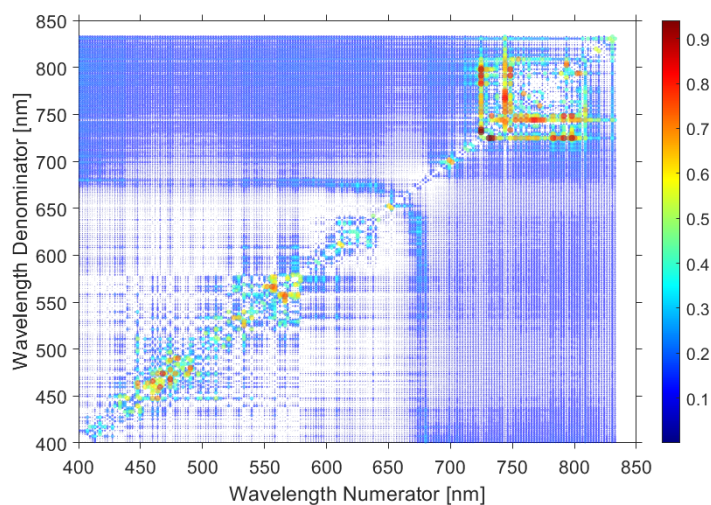

(a) Heat map of  $R^2$  values generated by fitting each band combination against epiphytic phycocyanin standing crops. Colors within the heat map represent the  $R^2$  value, with wavelength numerators and denominators shown on the x- and y-axes, respectively.

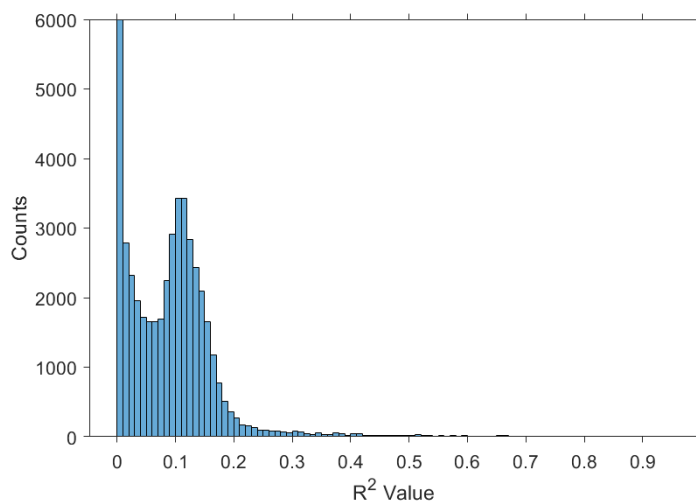

(b) Histogram of the  $R^2$  values generated using the brute-force analysis.

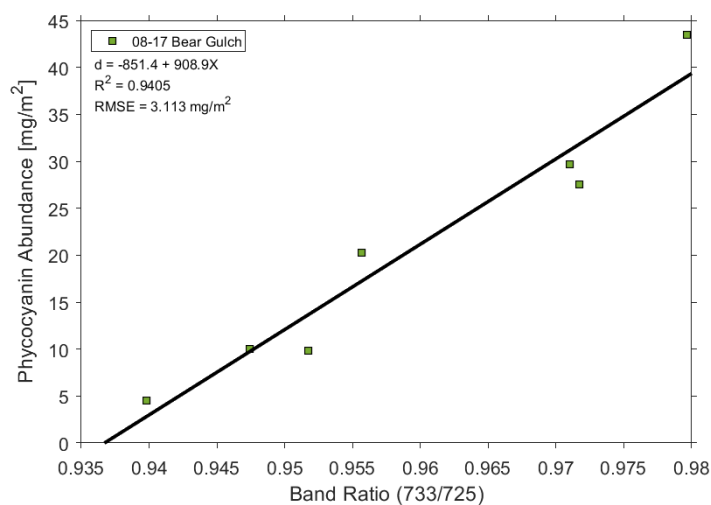

(c) Linear regression analysis between epiphytic phycocyanin abundance (y-axis) and optimal band ratio (x-axis). Data collected on 17 August 2021 at the Bear Gulch site represented by green squares.

**Figure S9.** Analytics from the regression analysis of epiphytic phycocyanin standing crops from the Bear Gulch data set.

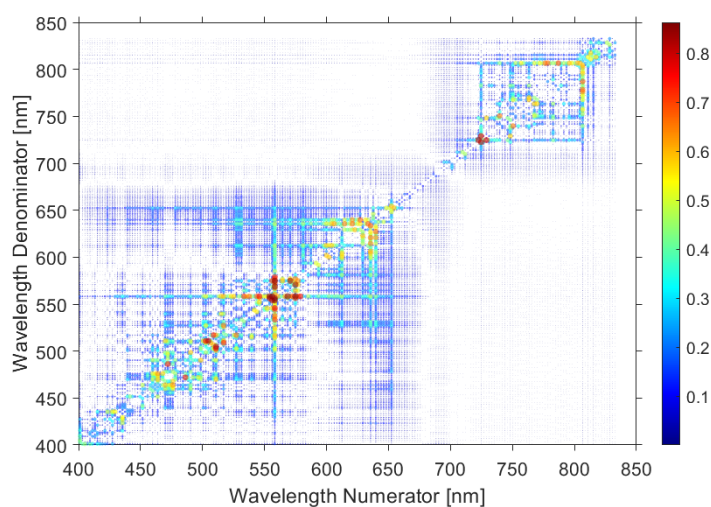

(a) Heat map of  $R^2$  values generated by fitting each band combination against epilithic chl *a* standing crops. Colors within the heat map represent the  $R^2$  value, with wavelength numerators and denominators shown on the x- and y-axes, respectively.

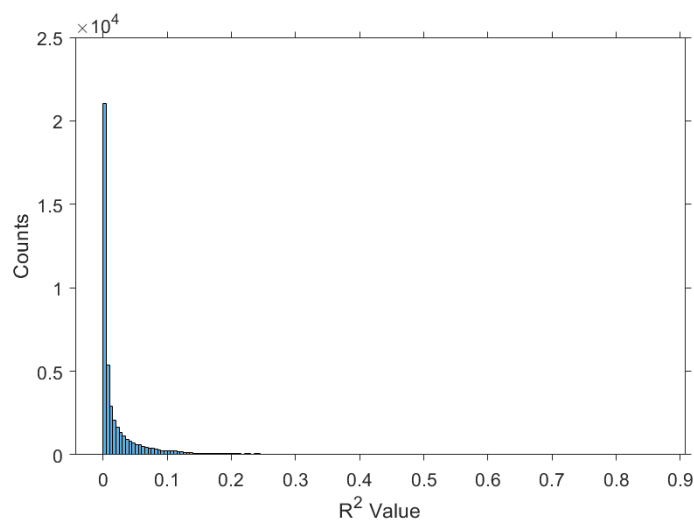

(b) Histogram of the  $R^2$  values generated using the brute-force analysis.

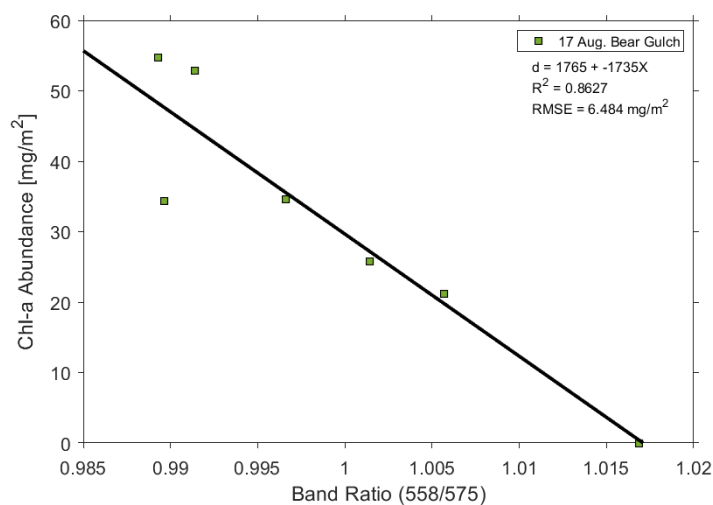

(c) Linear regression analysis between epilithic chl *a* abundance (y-axis) and optimal band ratio (x-axis). Data collected on 17 August 2021 at the Bear Gulch site represented by green squares.

**Figure S10.** Analytics from the regression analysis of epilithic chl *a* standing crops from the Bear Gulch data set.

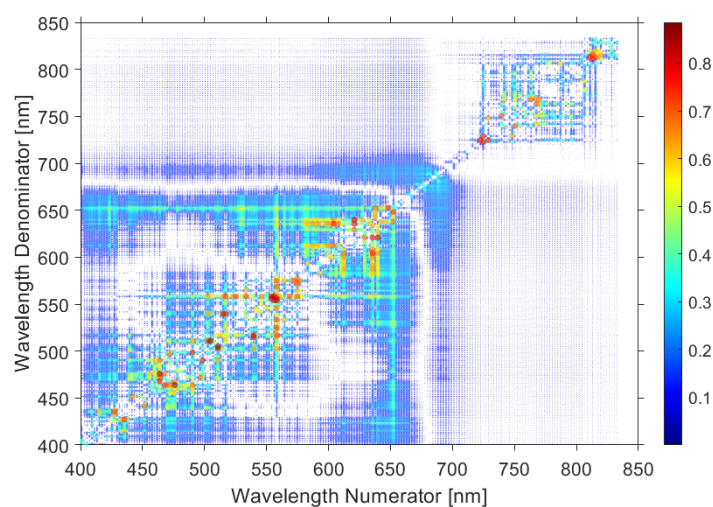

(a) Heat map of  $R^2$  values generated by fitting each band combination against epilithic phycocyanin standing crops. Colors within the heat map represent the  $R^2$  value, with wavelength numerators and denominators shown on the x- and y-axes, respectively.

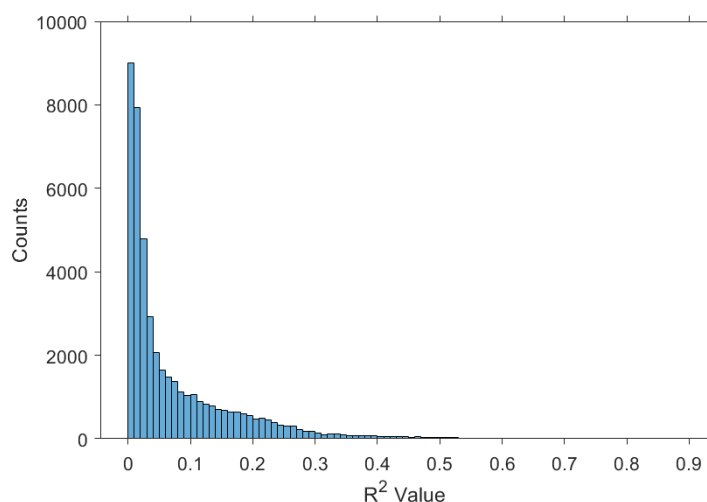

(b) Histogram of the  $R^2$  values generated using the brute-force analysis.

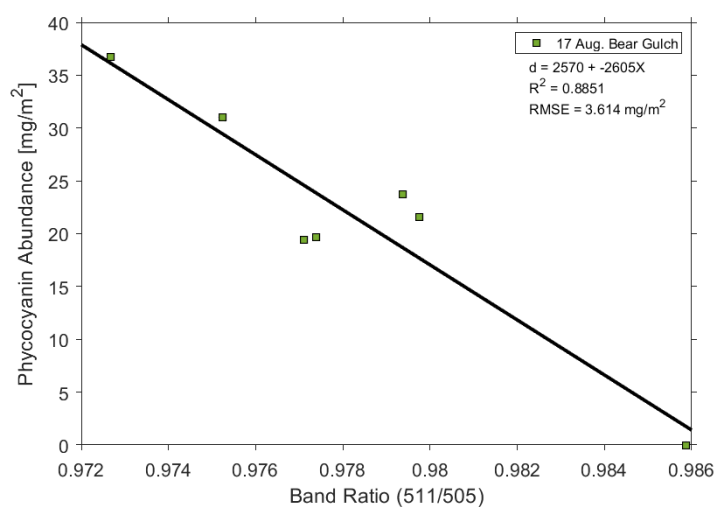

(c) Linear regression analysis between epilithic phycocyanin abundance (y-axis) and optimal band ratio (x-axis). Data collected on 17 August 2021 at the Bear Gulch site represented by green squares.

**Figure S11.** Analytics from the regression analysis of epilithic phycocyanin standing crops from the Bear Gulch data set.

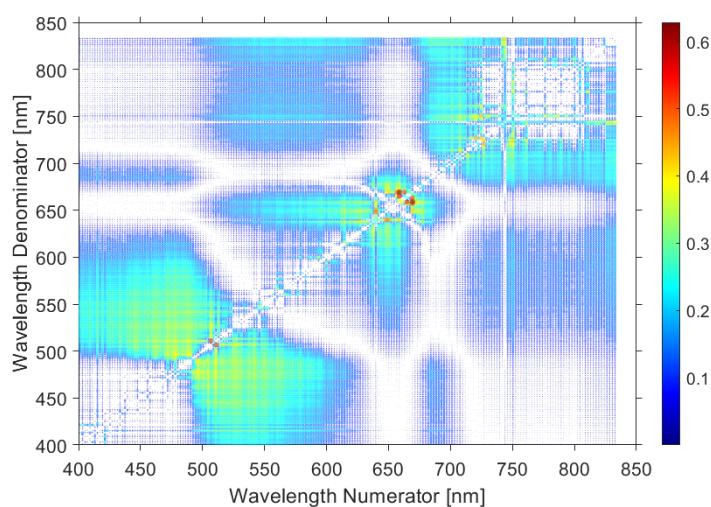

(a) Heat map of  $R^2$  values generated by fitting each band combination against total chl *a* standing crops. Colors within the heat map represent the  $R^2$  value, with wavelength numerators and denominators shown on the x- and y-axes, respectively.

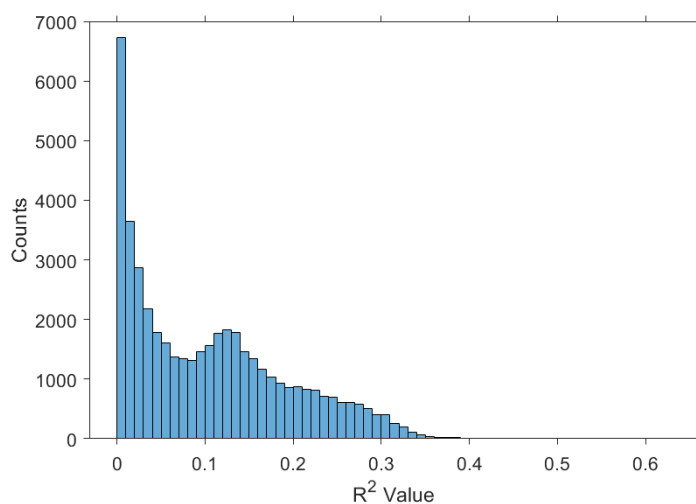

(b) Histogram of the  $R^2$  values generated using the brute-force analysis.

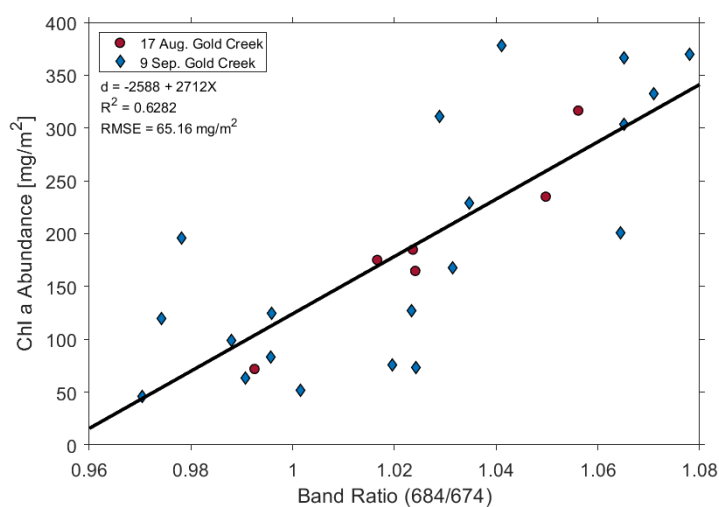

(c) Linear regression analysis between total chl *a* abundance (y-axis) and optimal band ratio (x-axis). Data collected on 17 August 2021 at the Gold Creek site represented by red circles, while data collected on 9 September 2021 are shown with blue diamonds.

**Figure S12.** Analytics from the regression analysis of total chl *a* standing crops from the Gold Creek data set.

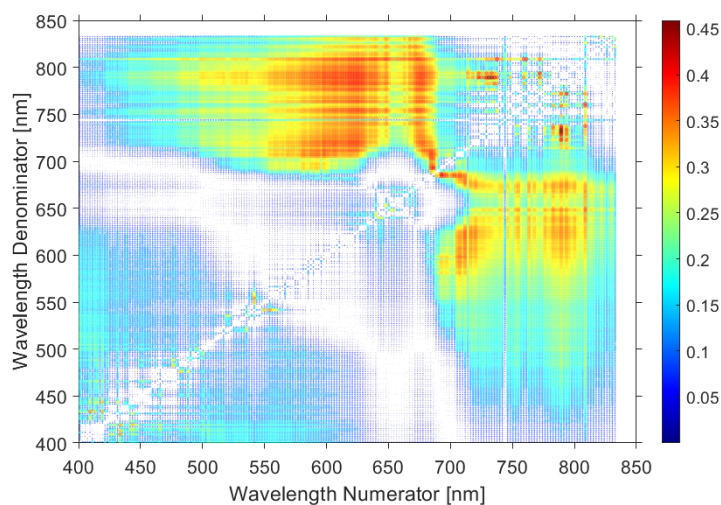

(a) Heat map of  $R^2$  values generated by fitting each band combination against total phycocyanin standing crops. Colors within the heat map represent the  $R^2$  value, with wavelength numerators and denominators shown on the x- and y-axes, respectively.

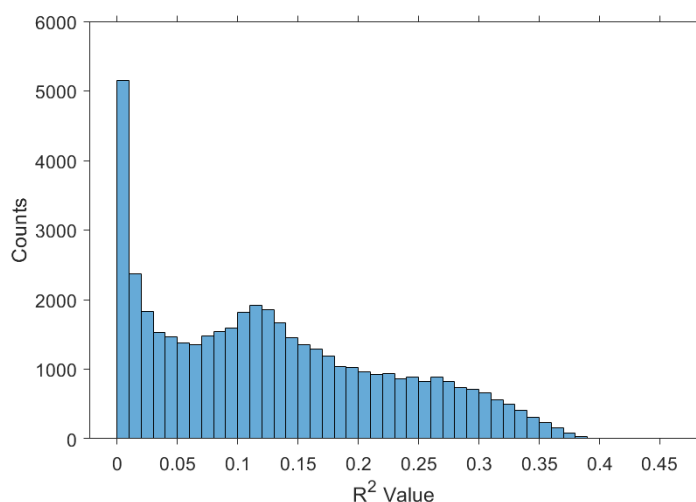

(b) Histogram of the  $R^2$  values generated using the brute-force analysis.

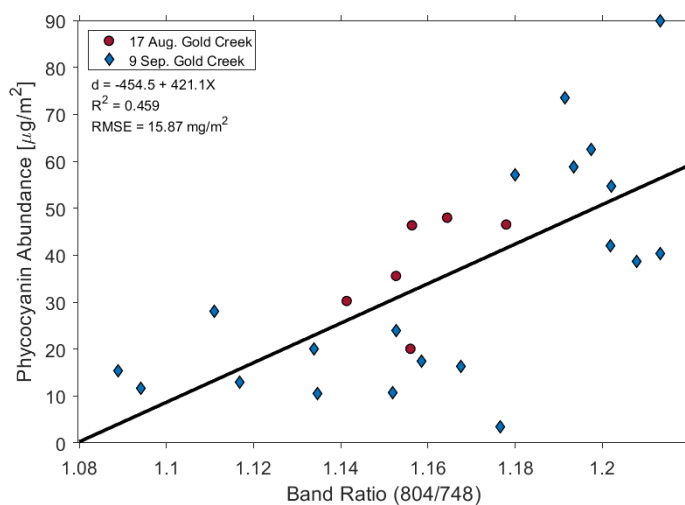

(c) Linear regression analysis between total phycocyanin abundance (y-axis) and optimal band ratio (x-axis). Data collected on 17 August 2021 at the Gold Creek site represented by red circles, while data collected on 9 September 2021 are shown with blue diamonds.

**Figure S13.** Analytics from the regression analysis of total phycocyanin standing crops from the Gold Creek data set.



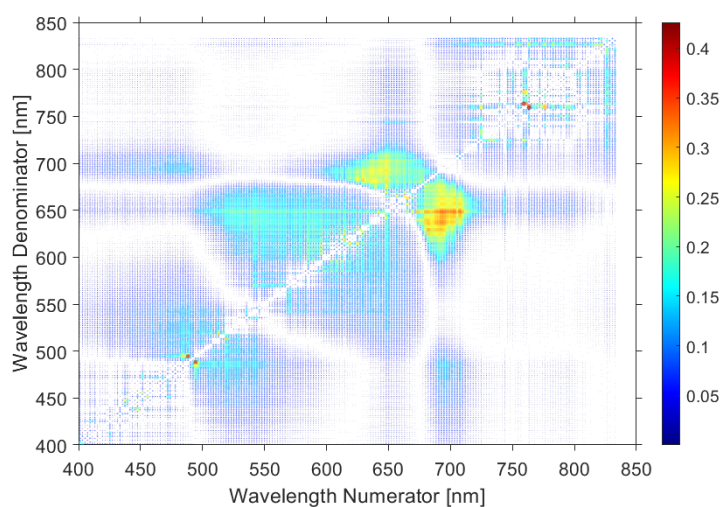

(a) Heat map of  $R^2$  values generated by fitting each band combination against epiphytic phycocyanin standing crops. Colors within the heat map represent the  $R^2$  value, with wavelength numerators and denominators shown on the x- and y-axes, respectively.

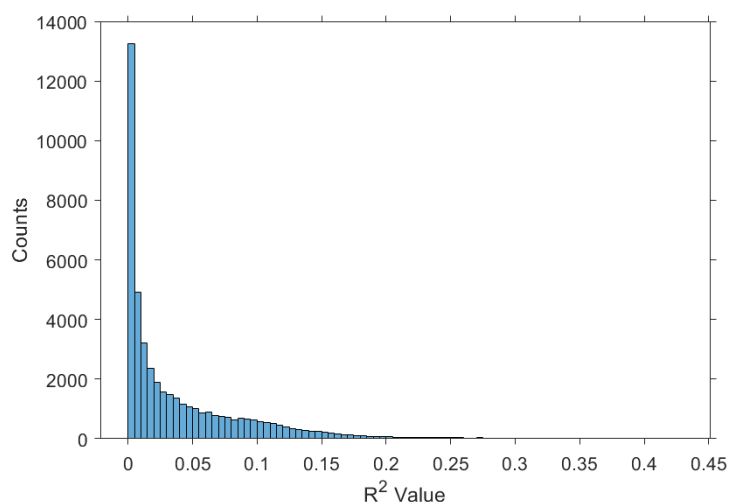

(b) Histogram of the  $R^2$  values generated using the brute-force analysis.

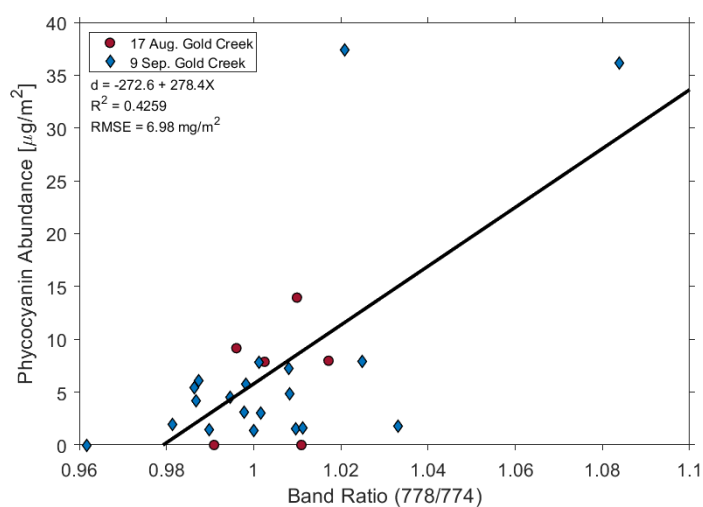

(c) Linear regression analysis between epiphytic phycocyanin abundance (y-axis) and optimal band ratio (x-axis). Data collected on 17 August 2021 at the Gold Creek site represented by red circles, while data collected on 9 September 2021 are shown with blue diamonds.

**Figure S14.** Analytics from the regression analysis of epiphytic phycocyanin standing crops from the Gold Creek data set.



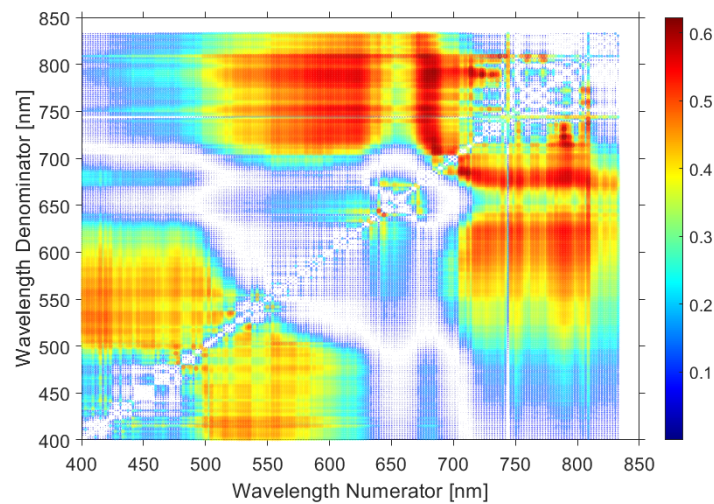

(a) Heat map of  $R^2$  values generated by fitting each band combination against epilithic chl *a* standing crops. Colors within the heat map represent the  $R^2$  value, with wavelength numerators and denominators shown on the x- and y-axes, respectively.

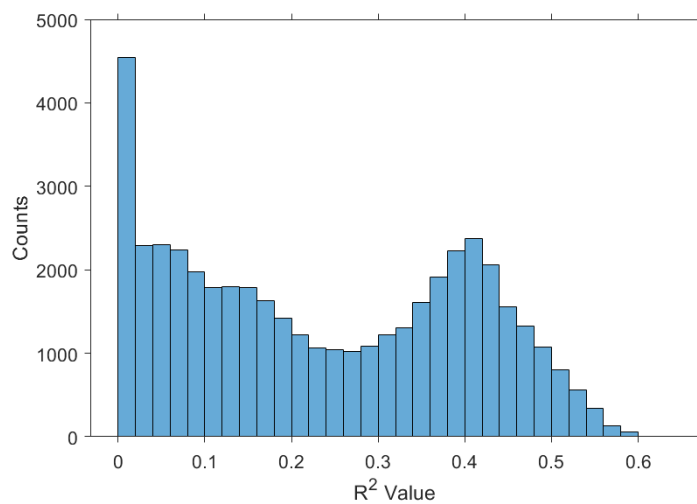

(b) Histogram of the  $R^2$  values generated using the brute-force analysis.

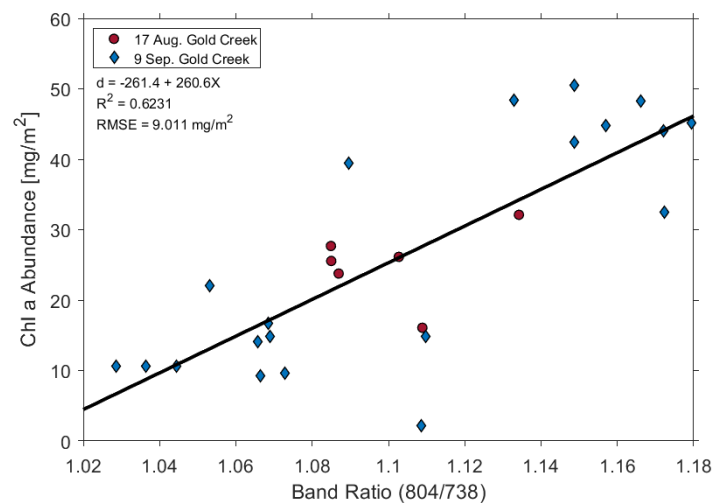

(c) Linear regression analysis between epilithic chl *a* abundance (y-axis) and optimal band ratio (x-axis). Data collected on 17 August 2021 at the Gold Creek site represented by red circles, while data collected on 9 September 2021 are shown with blue diamonds.

**Figure S15.** Analytics from the regression analysis of epilithic chl *a* standing crops from the Gold Creek data set.
